# Supplementary material for: Generation of a Model to Predict Differentiation and Migration of Lymphocyte Subsets under Homeostatic and CNS Autoinflammatory Conditions
Source: MDPI journal article supplement (doi:10.3390/ijms21062046), 2020-03-17
Supplement: s1 [file s1]

|            |                                   | Controls           | RRMS<br>naïve | RRMS<br>NAT | RRMS<br>ALEM | SuS<br>Training | SuS<br>Prediction |
|------------|-----------------------------------|--------------------|---------------|-------------|--------------|-----------------|-------------------|
| <b>CD4</b> | PB naïve<br>[x10 <sup>-2</sup> ]  | 94±3               | 92±4          | 94±2        | 82±7         | 90±9            | 92±3              |
|            | CSF naïve<br>[x10 <sup>-5</sup> ] | 10.66±26.58        | 55.49±96.47   | 4.93±14.7   | 71.1±136.6   | 18.94±26.55     | n.a.              |
|            | PB diff<br>[x10 <sup>-2</sup> ]   | 6.4±3.2            | 6.9±3.2       | 5.6±0.2     | 164±6.9      | 9.5±8.6         | 7.6±3.4           |
|            | CSF diff<br>[x10 <sup>-5</sup> ]  | 9.1±19.9           | 64.3±114.5    | 7.04±10.2   | 181.1±346.8  | 21.2±28.3       | n.a.              |
| <b>CD8</b> | PB naïve<br>[x10 <sup>-2</sup> ]  | 89±7               | 87±8          | 91±5        | 77±10        | 78±18           | 88±8              |
|            | CSF naïve<br>[x10 <sup>-4</sup> ] | 9.7±24.9           | 57.6±117.9    | 13.6±26.3   | 99.7±178.4   | 11.1±14.6       | n.a.              |
|            | PB diff<br>[x10 <sup>-2</sup> ]   | 10.6±6.8           | 12.4±8.1      | 8.5±4.8     | 21.6±9.7     | 22.3±17.5       | 12.4±7.9          |
|            | CSF diff<br>[x10 <sup>-4</sup> ]  | 5.3±20.5           | 38.0±81.4     | 845.3±475.5 | 90.9±169.1   | 7.7±8.3         | n.a.              |
| <b>B</b>   | PB naïve<br>[x10 <sup>-2</sup> ]  | 99±1               | 99±2          | 99±1        | 100±0        | 99±2            | 100±0             |
|            | CSF naïve<br>[x10 <sup>-5</sup> ] | 5.1±7.9            | 149.7±403.3   | 4.8±9.3     | 103.7±198.5  | 33.0±78.0       | n.a.              |
|            | PB diff<br>[x10 <sup>-3</sup> ]   | 5.1±6.2            | 6.9±14.1      | 5.4±6.8     | 2.8±2.1      | 10.7±17.7       | 3.9±6.9           |
|            | CSF diff<br>[x10 <sup>-6</sup> ]  | 0.01647±<br>0.0815 | 277.4±811.9   | 3.5±19.0    | 203.1±443.6  | 0.04048±1.4     | n.a.              |
| <b>NK</b>  | PB naïve<br>[x10 <sup>-2</sup> ]  | 6.3±4.2            | 7.4±5.7       | 11.6±8.0    | 21.2±10.4    | 7.3±6.3         | 10.5±10.5         |
|            | CSF naïve<br>[x10 <sup>-5</sup> ] | 7.9±13.5           | 76.2±254.1    | 6.8±9.2     | 134.6±302.9  | 7.8±8.7         | n.a.              |
|            | PB diff<br>[x10 <sup>-2</sup> ]   | 94±4               | 93±6          | 88±8        | 79±10        | 93±6            | 90±11             |
|            | CSF diff<br>[x10 <sup>-5</sup> ]  | 2.2±7.6            | 15.0±36.8     | 4.5±9.2     | 16.6±29.9    | 2.9±2.8         | n.a.              |

Supplemental Table 1: Patient based data. Mean values ± standard deviations (SD) of relative proportions of the respective lymphocyte subsets are displayed. N.a. = not applicable.
